# Supplementary material for: Factors Associated with Influenza and Pneumococcal Vaccine Hesitancy Among Patients with AECOPD using the 3C Model: A Cross-Sectional Study in China
Source: Research Square preprint supplement (doi:10.21203/rs.3.rs-6437931/v1), 2025-05-16
Supplement: Supplementary file 1 [file 82fd5a242a429551ba609271.pdf]

Center Number: \_\_\_\_\_

Patient Number: \_\_\_\_\_

Center Name: \_\_\_\_\_

## **Assessment Questionnaire for Patients with Acute Exacerbation of Chronic Obstructive Pulmonary Disease**

### **Informed Consent Form**

This health survey is funded by the "Innovation Project of Medical and Health Science and Technology of the Chinese Academy of Medical Sciences."

**Purpose:** To establish and validate a prediction model for the recurrence of acute exacerbation and readmission within 30 days after discharge in patients with acute exacerbation of COPD.

**Content:** This survey will collect your personal basic information and the disease and treatment details related to this hospitalization for COPD. Additionally, we will follow up on your prognosis 30 days after discharge.

**Benefits:** You will receive a personalized assessment of the risk of recurrence or readmission within the next 30 days following this acute exacerbation of COPD, as well as guidance for treatment and rehabilitation.

**Potential Risks:** The risks associated with this survey will not exceed those of routine medical diagnosis and treatment.

**Confidentiality Assurance:** We guarantee that your personal information and test results will not be disclosed in any manner under any circumstances.

**Voluntary Principle:** Participation in this survey is voluntary. You have the right to refuse to participate or withdraw at any time without affecting your medical treatment or rights.

You may ask the investigators any questions about this survey at any time and receive corresponding answers.

### **Declaration of Informed Consent:**

I have been informed of the purpose, content, process, risks, and benefits of this study. I have read this informed consent form and agree to participate in this study.

**Participant's Signature:** \_\_\_\_\_ or (Right Index Finger Print) \_\_\_\_\_

Investigator's Signature: \_\_\_\_\_ Survey Date: \_\_\_\_\_

Admission Date: \_\_\_\_\_

**Inclusion Criteria (If any item is not met, the patient cannot be included)**

1. Age 18 years or older

Yes No

2. Patients whose primary reason for hospitalization is confirmed or suspected acute exacerbation of chronic obstructive pulmonary disease (COPD)

Yes No

**Exclusion Criteria (If any item is met, the patient cannot be included)**

1. Refusal to sign the informed consent form

Yes No

2. Participants currently involved in other drug clinical trials or interventional studies

Yes No

**Part I: Demographic characteristics and smoking history**

***Basic Information***

Name: \_\_\_\_\_

Case Number: \_\_\_\_\_

Gender: \_\_\_\_\_

ID Number: \_\_\_\_\_

Actual Date of Birth: \_\_\_\_\_

Education Level: ☐ Primary School or Below ☐ Junior High School ☐ Senior High School / Vocational School ☐ University / Junior College

Telephone Number: \_\_\_\_\_

***Smoking History***

(1) Do you smoke? ☐ Current smoker (total cigarettes smoked exceeds 100) [Continue to (2)]  
☐ Former smoker (total cigarettes smoked exceeded 100, and quit smoking for more than six months) [Continue to (2)] ☐ Never smoked [Skip to Question 8]

(2) Age when you started smoking: \_\_\_\_\_ years old

If you have quit smoking, age when you quit smoking: \_\_\_\_\_ years old, reason for quitting smoking:

☐ Quit smoking due to illness

☐ Quit smoking after being persuaded by others

☐ Quit smoking on your own initiative

☐ Other

**Part II: Medical history related to COPD**

***Before this hospitalization, have you been diagnosed with chronic obstructive pulmonary disease (COPD) by a doctor?***

☐ Not diagnosed

☐ Previously diagnosed with COPD, the diagnosis time was \_\_\_\_\_

whether the diagnosis of COPD was made after a pulmonary function test.

Yes    No

***History of acute exacerbation:***

In the past 12 months, how many times have you had acute exacerbations of COPD?

\_\_\_\_\_

How many times have you been hospitalized due to acute exacerbations of COPD?

\_\_\_\_\_

How many times have you visited the emergency department due to acute exacerbations of COPD?

\_\_\_\_\_

***Treatment history:***

(1) In the year before this episode of illness, have you received the following COPD pharmacological treatments?

Regular use (for more than 3 months) of long-acting bronchodilators:

Yes    No

Regular use (for more than 3 months) of inhaled corticosteroids:

Yes    No

(2) In the year before this episode of illness, have you received the following COPD non-pharmacological treatments?

Pulmonary rehabilitation therapy (e.g., pursed-lip breathing, diaphragmatic breathing, physical exercise, nutritional support, psychological therapy):

Yes    No

Home oxygen therapy: Yes, for \_\_\_\_\_ hours per day    No

Non-invasive ventilation: Yes    No

**Part III: Self-reported vaccination status against influenza and pneumonia**

***Have you used the following treatments to prevent acute exacerbations of COPD?***

Have you ever received the influenza vaccine or pneumonia vaccine to prevent acute exacerbations of COPD (excluding the COVID-19 vaccine)?

Yes    No

Received the influenza vaccine within the past year

Yes    No

Received the pneumonia vaccine within the past 5 years (excluding the COVID-19 vaccine)

Yes    No

Have you received the COVID-19 vaccine?

Yes    No

**Part IV: Assessment scales for respiratory symptoms and functional status**  
***Global Initiative for Chronic Obstructive Lung Disease (GOLD)***

Pulmonary Function Tests (During Hospitalization)

| Item     | Predicted Value | Pre-Bronchodilator Measured Value | Post-Bronchodilator Measured Value |
|----------|-----------------|-----------------------------------|------------------------------------|
| FVC      | (L)             | (L)                               | (L)                                |
| FEV1     | (L)             | (L)                               | (L)                                |
| FEV1/FVC | (%)             | (%)                               | (%)                                |

COPD assessment test (CAT)

|                                                                        |   |   |   |   |   |   |                                                                         |
|------------------------------------------------------------------------|---|---|---|---|---|---|-------------------------------------------------------------------------|
| I never cough.                                                         | 0 | 1 | 2 | 3 | 4 | 5 | I always cough.                                                         |
| I have no phlegm at all.                                               | 0 | 1 | 2 | 3 | 4 | 5 | I have a lot of phlegm.                                                 |
| I don't feel any chest tightness.                                      | 0 | 1 | 2 | 3 | 4 | 5 | I have a very severe feeling of chest tightness.                        |
| When I go up a hill or a flight of stairs, I don't feel out of breath. | 0 | 1 | 2 | 3 | 4 | 5 | When I go up a hill or a flight of stairs, I feel very out of breath.   |
| My activities at home are not affected by COPD.                        | 0 | 1 | 2 | 3 | 4 | 5 | My activities at home are greatly affected by COPD.                     |
| Despite my lung disease, I am confident about going out.               | 0 | 1 | 2 | 3 | 4 | 5 | I have no confidence at all about going out because of my lung disease. |
| I sleep well.                                                          | 0 | 1 | 2 | 3 | 4 | 5 | I sleep poorly because of my lung disease.                              |
| I am full of energy.                                                   | 0 | 1 | 2 | 3 | 4 | 5 | I have no energy at all.                                                |

Modified Medical Research Council (mMRC) Dyspnea Scale

- ☐ 0 = No significant breathlessness (except with strenuous exercise)
- ☐ 1 = Short of breath when walking quickly or going up a slight hill
- ☐ 2 = Walks more slowly than contemporaries because of breathlessness or has to stop for breath when walking at own pace on level ground
- ☐ 3 = Has to stop for breath after walking about 100 meters or after a few minutes on level ground
- ☐ 4 = Too breathless to leave the house or breathless when dressing

**Part V: Documentation of complications and comorbid conditions**

***Complications/Comorbidities during hospitalization: (Multiple choices)***

- ☐ Respiratory failure
- ☐ Cor pulmonale
- ☐ Pulmonary Infection
- ☐ Asthma
- ☐ Bronchiectasis

- ☐ Pulmonary hypertension
- ☐ Pulmonary thromboembolism
- ☐ Lung cancer
- ☐ Hypertension
- ☐ Diabetes mellitus
- ☐ Coronary heart disease
- ☐ Acute heart failure
- ☐ Chronic heart failure
- ☐ Cerebrovascular disease
- ☐ Gastroesophageal reflux disease
- ☐ Other \_\_\_\_\_

**Part VI: Reasons for not receiving the influenza or pneumonia vaccines**

***Reasons for not receiving the influenza or pneumonia vaccines (multiple choices)***

- ☐ I am unaware that I need to get vaccinated (Lack of perceived need)
- ☐ I am very healthy and do not need to be vaccinated (Health status overconfidence)
- ☐ I believe the diseases are not harmful enough, so there is no need (Disease severity underestimation)
- ☐ I am concerned about the potential adverse reactions to the vaccine (Vaccine safety concerns)
- ☐ I think the vaccines are ineffective or have limited effectiveness (Vaccine effectiveness doubt)
- ☐ I consider the vaccine prices too expensive (Financial barriers)
- ☐ The vaccination sites are inconveniently located (Geographical inaccessibility)
- ☐ I do not know where to get vaccinated (Lack of vaccination site awareness)
- ☐ Other \_\_\_\_\_
